# Supplementary material for: Identification of cbiO Gene Critical for Biofilm Formation by MRSA CFSa36 Strain Isolated from Pediatric Patient with Cystic Fibrosis
Source: MDPI journal article supplement (doi:10.3390/pathogens10111363), 2021-10-21
Supplement: s1 [file s1]

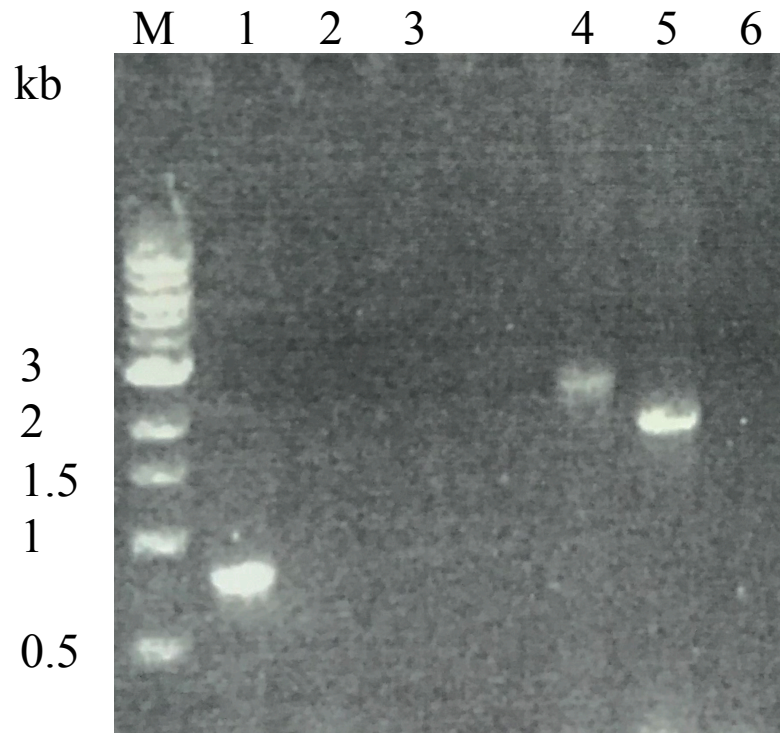

Figure S1

Lane 1 & 4: CFSa36; lane 2 & 5: CFSa36 $\Delta$ cbiO; lane 3 & 6: negative controls.  
M: 1 kb DNA ladder. Lane 1-3: cibo-pKOR1\_LF/ cbio-pKOR1\_RR primers  
Lane 4 – 6: cbioFor/cbioRev primers.

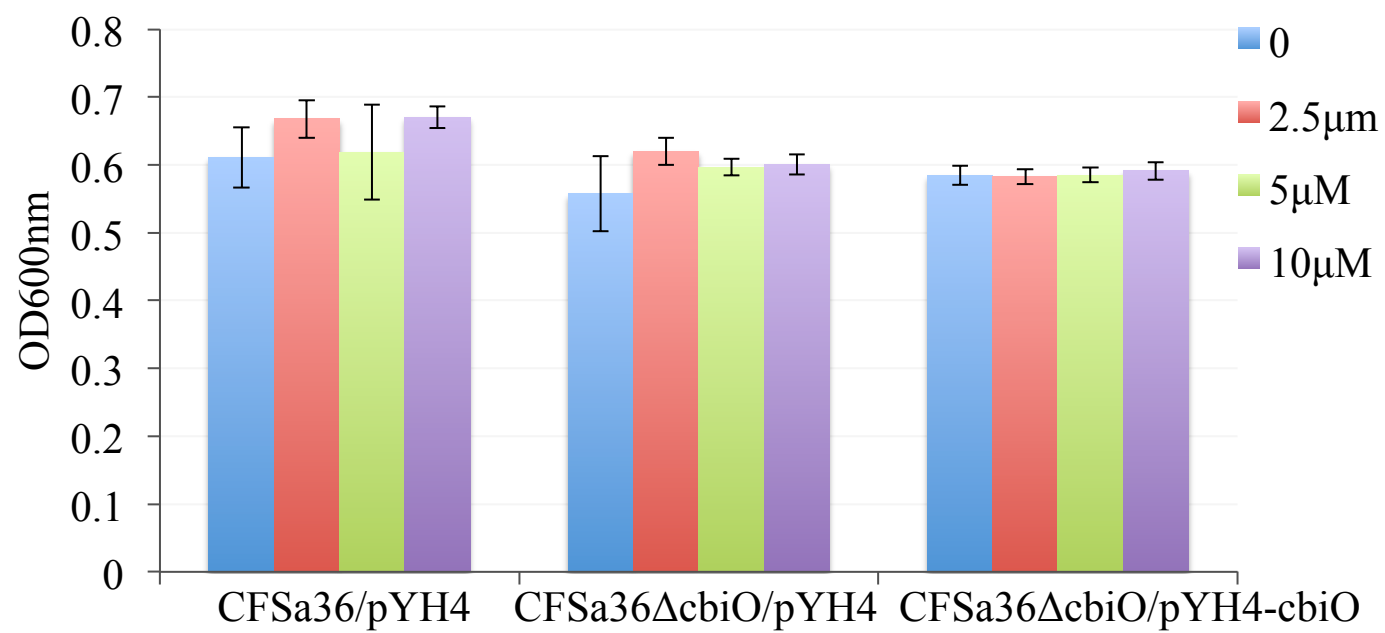

Figure S2

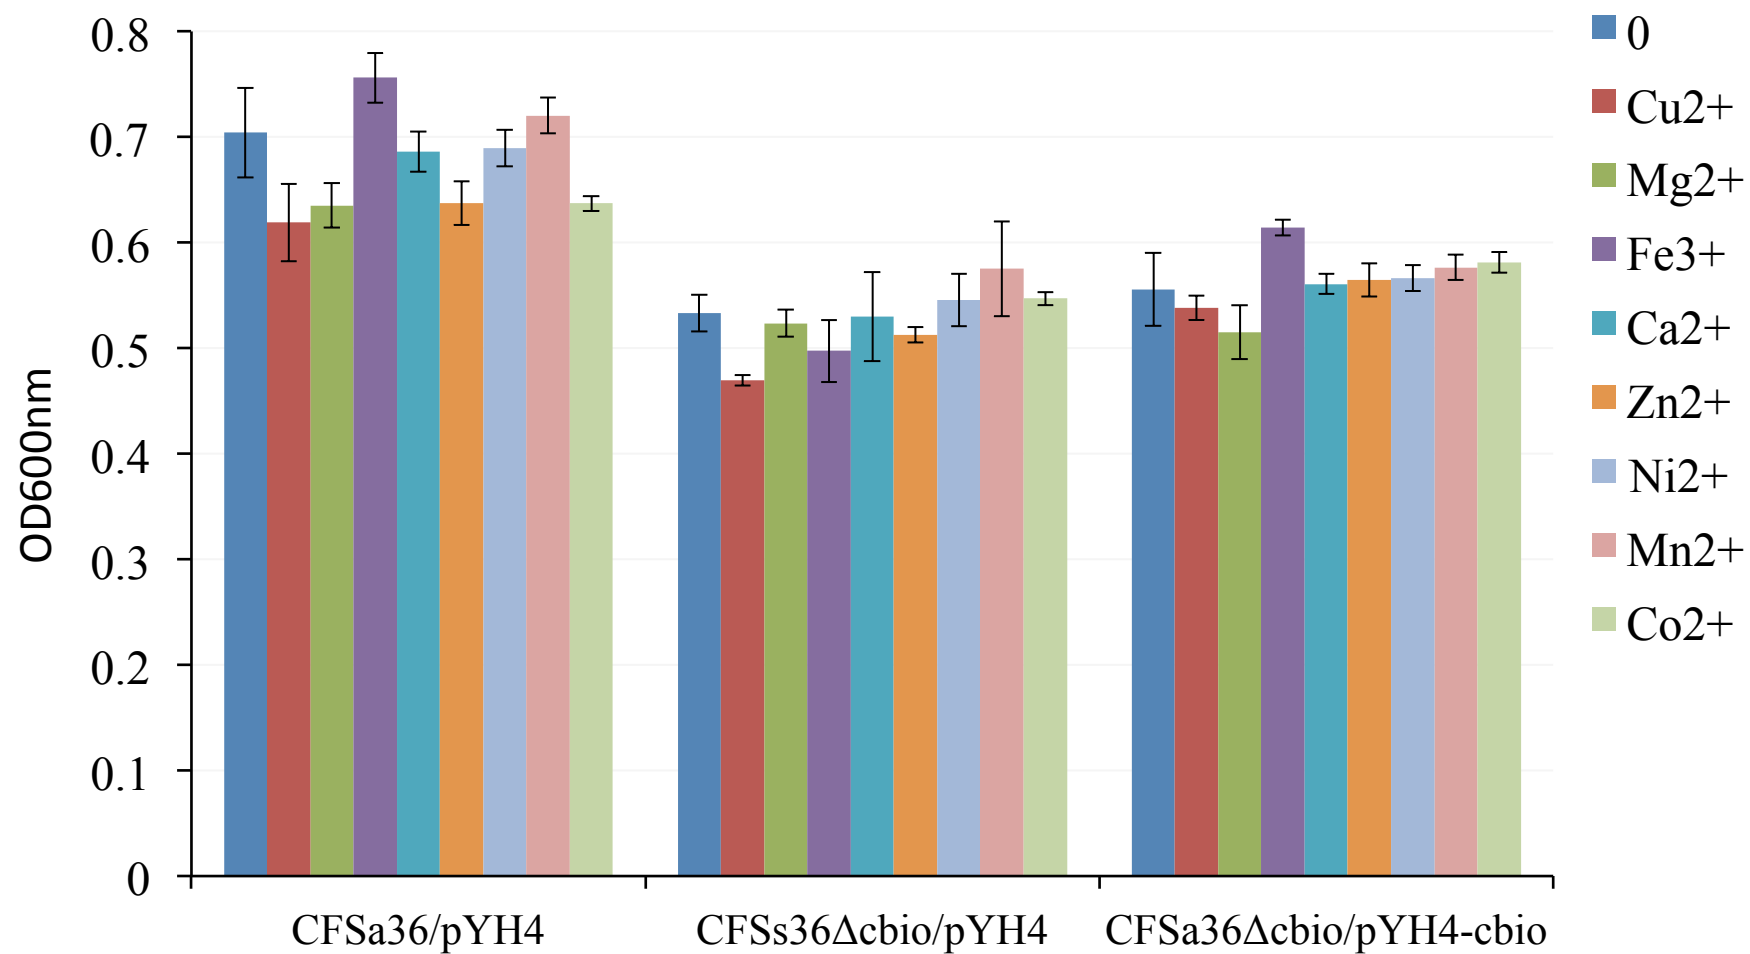

Figure S3

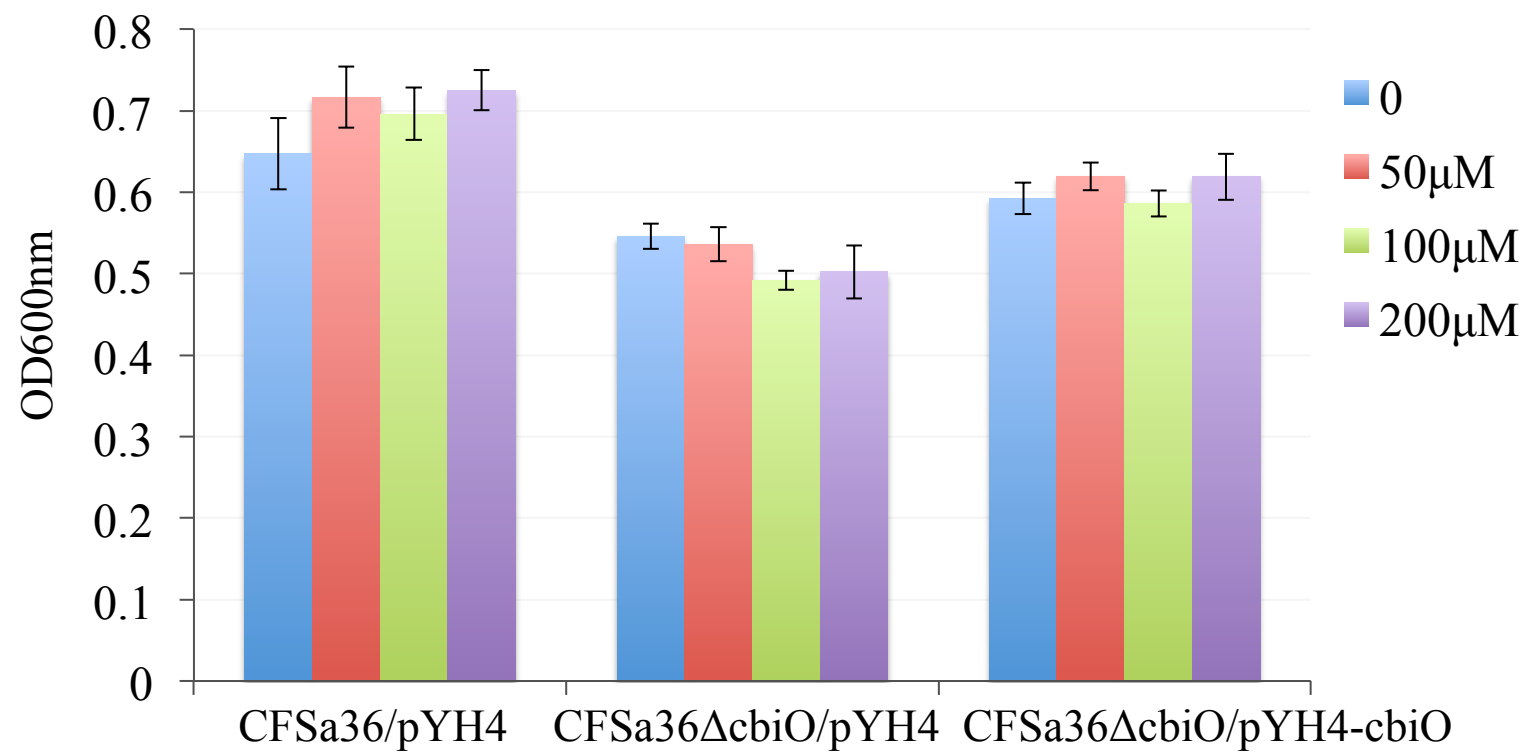

Figure S4
